# Supplementary material for: Viscoelastic Polyurethane Foams for Use as Auxiliary Materials in Orthopedics
Source: MDPI journal article supplement (doi:10.3390/ma15010133), 2021-12-24
Supplement: s1 [file s1]

# Viscoelastic Polyurethane Foams for Use as Auxiliary Materials in Orthopedics

Dominik Grzęda, Grzegorz Węgrzyk, Milena Leszczyńska \*, Leonard Szczepkowski, Michał Gloc and Joanna Ryszkowska \*

## Section S1. The Synthesis Procedure.

After adding the isocyanate component to the masterbatch, the system was mixed using a high-speed stirrer (Siemens 3 MOT 1LA/080, Siemens, Munich, Germany) at 3000 rpm over 6 s. The mixture was poured into a 1500 ml open polypropylene mould. The foaming process parameters (start, rise, and gel time) were determined during the synthesis. Subsequently, the foams were cured at 70°C for 30 min and conditioned at ambient temperature for 22 h before demolding. Before testing, the samples were conditioned at ambient temperature for at least 72 h.

## Section S2. The Chemical Composition of the Foams

### Results of ATR-FTIR Spectra of the Tested Foams

Paragraph 3.3 shows the results of the spectroscopic analysis of the produced materials. Table S1 summarises bonds identified in examined foams.

**Table S1.** Summary of identified bonds present in investigated foams.

| Wavenumber [cm <sup>-1</sup> ] | Bond                                   | Vibration type                          |
|--------------------------------|----------------------------------------|-----------------------------------------|
| 3502                           | OH                                     | stretching                              |
| 3345–3296                      | NH                                     | stretching                              |
| 3120                           | CH (aromatic)                          | stretching                              |
| 2970–2861                      | CH (methyl and methylene)              | Asymmetrical and symmetrical stretching |
| 1724–1708 (amide I band)       | C=O (urethane, nonbonded and H-bonded) | stretching                              |
| 1596                           | C=C (aromatic ring)                    | stretching                              |
| 1537–1503 (amide II band)      | C-N-H (urethane)                       | N-H bending + C-N stretching            |
| 1460–1450 (amide II band)      | C-N-H (urea)                           | stretching                              |
| 1412–1344                      | C-H (methylene)                        | bending and wagging                     |
| 1304–1306                      | C-N (urethane)                         | stretching                              |
| 1232 (amide III band)          | C-O-C (ether)                          | asymmetrical stretching                 |
|                                | N-H                                    | bending                                 |
|                                | C-N                                    | stretching                              |
| 1178                           | C-H                                    | wagging                                 |
| 1093–1085                      | C-O (urethane and ether group)         | stretching                              |
| 1016                           | C-H                                    | symmetrical stretching                  |
| 765 and 818                    | CH (aromatic ring)                     |                                         |

### Section S3. The Thermal Analysis of the Foams

#### *Thermogram DSC (Differential Scanning Calorimetry) of the Tested Foams*

Section 3.6 presents the results of the DSC analysis of the produced materials, Figure S1 presents exemplary DSC thermograms of foams produced with the variable INCO (isocyanate index) in examined foams

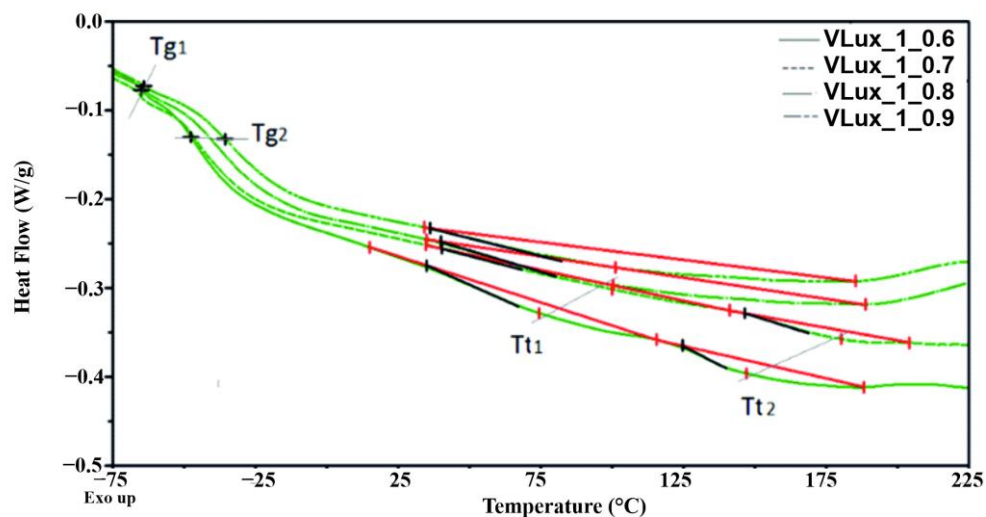

**Figure S1.** DSC derivative thermograms obtained in the first heating cycle for foams with different INCO and 1php water.

Section 3.7 shows the results of the TGA analysis of the produced materials produced with a variable INCO. Figure S2 presents results of TGA analysis and parameters description for foams with different INCO: (a) series VLux\_2, (b) series VLux\_3 and Table S2 presents the results of TG and DTG curves of prepared foams analysis.

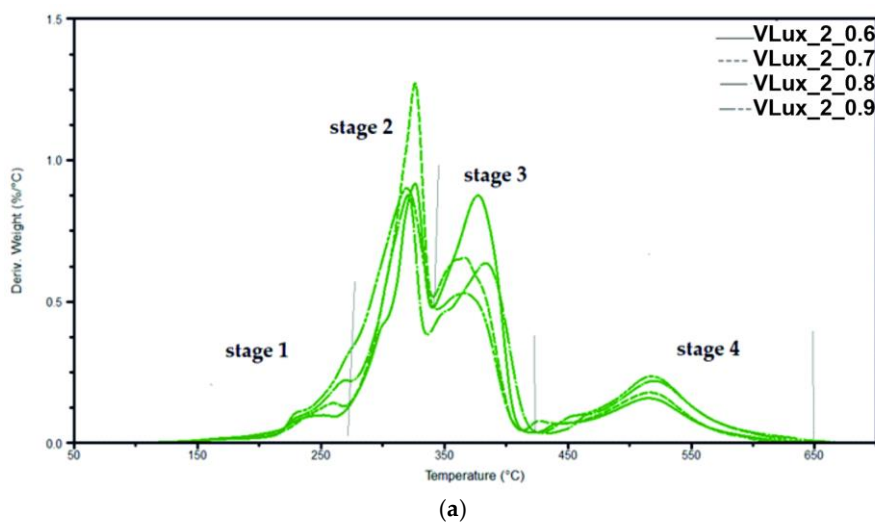

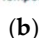

**Table S2.** The results of TG and DTG curves of prepared foams analysis.

| Sample Symbol                                          |      |      |      |        |      |      |      |        |      |      |      |
|--------------------------------------------------------|------|------|------|--------|------|------|------|--------|------|------|------|
| VLux_1                                                 |      |      |      | VLux_2 |      |      |      | VLux_3 |      |      |      |
| 0.6                                                    | 0.7  | 0.8  | 0.9  | 0.6    | 0.7  | 0.8  | 0.9  | 0.6    | 0.7  | 0.8  | 0.9  |
| Results of TG and DTG Curves Analysis                  |      |      |      |        |      |      |      |        |      |      |      |
| T2% °C                                                 |      |      |      |        |      |      |      |        |      |      |      |
| 207                                                    | 214  | 218  | 218  | 218    | 224  | 227  | 227  | 218    | 220  | 222  | 225  |
| T5% °C                                                 |      |      |      |        |      |      |      |        |      |      |      |
| 257                                                    | 260  | 255  | 249  | 254    | 255  | 253  | 251  | 249    | 248  | 246  | 246. |
| Step 1                                                 |      |      |      |        |      |      |      |        |      |      |      |
| Tmax1 (the temperature. at which Vmax1 is reached), °C |      |      |      |        |      |      |      |        |      |      |      |
| 227                                                    | 238  | 229  | 228  | 237    | 259  | 266  | 228  | 229    | 225  | 224  | 227  |
| Vmax1 (maximum degradation rate of step 1), %/°C       |      |      |      |        |      |      |      |        |      |      |      |
| 0.07                                                   | 0.07 | 0.08 | 0.09 | 0.09   | 0.15 | 0.22 | 0.10 | 0.09   | 0.11 | 0.13 | 0.14 |
| Δm <sub>1</sub> , wt.%                                 |      |      |      |        |      |      |      |        |      |      |      |
| 3.4                                                    | 4.1  | 4.3  | 6.4  | 4.6    | 6.7  | 10.0 | 3.2  | 3.8    | 3.7  | 3.1  | 2.6  |
| Step 2                                                 |      |      |      |        |      |      |      |        |      |      |      |
| Tmax2 (the temperature. at which Vmax2 is reached), °C |      |      |      |        |      |      |      |        |      |      |      |
| 333                                                    | 322  | 324  | 319  | 326    | 327  | 321  | 320  | 316    | 309  | 297  | 297  |
| Vmax2 (maximum degradation rate of step 2), %/°C       |      |      |      |        |      |      |      |        |      |      |      |
| 0.38                                                   | 0.63 | 1.02 | 0.81 | 0.92   | 1.27 | 0.88 | 0.90 | 0.84   | 1.05 | 1.58 | 1.76 |
| Δm <sub>2</sub> , wt.%                                 |      |      |      |        |      |      |      |        |      |      |      |
| 30                                                     | 32   | 37   | 31   | 33     | 41   | 30   | 49   | 36     | -    | -    | -    |
| Step 3                                                 |      |      |      |        |      |      |      |        |      |      |      |
| Tmax3 (the temperature. at which Vmax3 is reached), °C |      |      |      |        |      |      |      |        |      |      |      |
| 388                                                    | 390  | 389  | 393  | 378    | 367  | 383  | 366  | 390    | -    | -    | -    |
| Vmax3 (maximum degradation rate of step 3), %/°C       |      |      |      |        |      |      |      |        |      |      |      |
| 1.49                                                   | 1.29 | 0.97 | 1.01 | 0.87   | 0.65 | 0.64 | 0.53 | 0.71   | -    | -    | -    |
| Δm <sub>3</sub> , %                                    |      |      |      |        |      |      |      |        |      |      |      |
| 52                                                     | 48   | 40   | 43   | 43     | 33.  | 38   | 27   | 73     | 69   | 72   | 71   |
| Step 4                                                 |      |      |      |        |      |      |      |        |      |      |      |
| Tmax4 (the temperature at which Vmax4 is reached), °C  |      |      |      |        |      |      |      |        |      |      |      |

|                                                  |      |      |      |      |      |      |      |      |      |      |      |
|--------------------------------------------------|------|------|------|------|------|------|------|------|------|------|------|
| 525                                              | 521  | 520  | 520  | 517  | 517  | 522  | 517  | 518  | 525  | 530  | 531  |
| Vmax4 (maximum degradation rate of step 4), %/°C |      |      |      |      |      |      |      |      |      |      |      |
| 0.15                                             | 0.14 | 0.17 | 0.21 | 0.16 | 0.18 | 0.22 | 0.24 | 0.25 | 0.22 | 0.26 | 0.27 |
| $\Delta m_4$ , wt. %                             |      |      |      |      |      |      |      |      |      |      |      |
| 10.7                                             | 11.7 | 13.0 | 14.6 | 14.7 | 17.0 | 18.7 | 18.7 | 17.4 | 18.3 | 17.2 | 17.6 |
| $U_{600}$ , wt. %                                |      |      |      |      |      |      |      |      |      |      |      |
| 1.0                                              | 1.6  | 1.4  | 0.9  | 1.6  | 0.1  | 0.9  | 0    | 1.1  | 1.6  | 0    | 0    |

Section 3.8 shows the results of gel fraction analysis of the produced materials with a variable INCO, Figure S3 presents results from DSC analysis before and after exposure to DMF for VLux foam samples with INCO=0.7 and Figure S4 presents DTG curves of foams before and after exposure to DMF: (a) VLux\_1\_0.7, (b) VLux\_2\_0.7 and (c) VLux\_3\_0.7. Table S3 summarizes DSC results obtained from the first heating cycle after DMF.

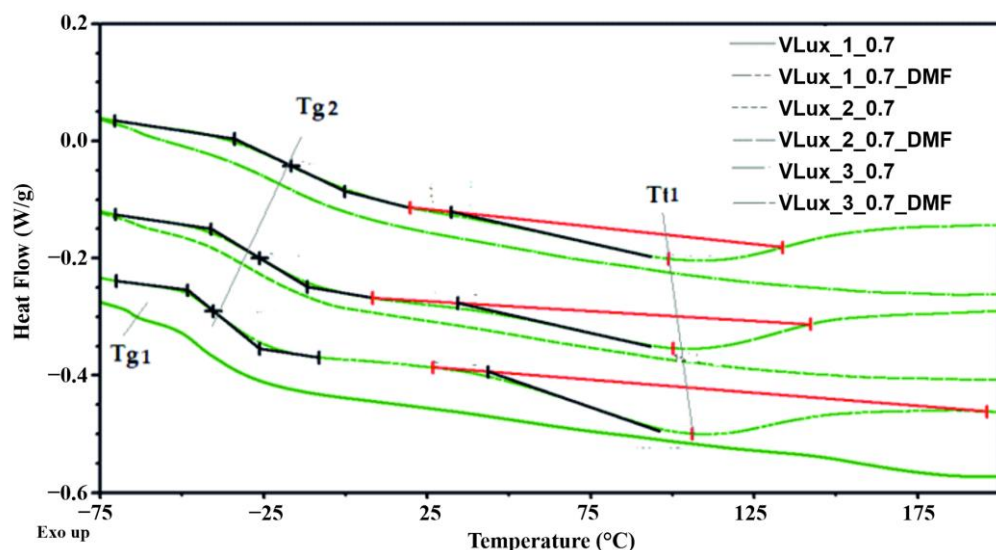

**Figure S3.** Thermogram DSC of polyurethane foams with INCO = 0.7 and different content of water before and after of DMF exposition.

**Table S3.** Differential scanning calorimetry DSC results obtained from the first heating cycle after DMF.

| Sample Symbol | $T_{g2DMF}$ [°C] | $C_{p2DMF}$ [J/g·°C] | $T_{i2DMF}$ [°C] | $\Delta H_{1\Delta M\Phi}$ [J/g] |
|---------------|------------------|----------------------|------------------|----------------------------------|
| VLux_1_0.6    | -45.2            | 0.60                 | 100.0            | 38.5                             |
| VLux_1_0.7    | -41.7            | 0.56                 | 99.2             | 31.7                             |
| VLux_1_0.8    | -35.9            | 0.58                 | 79.5             | 29.6                             |
| VLux_1_0.9    | -31.7            | 0.58                 | 91.4             | 29.5                             |
| VLux_2_0.6    | -35.7            | 0.60                 | 85.5             | 25.5                             |
| VLux_2_0.7    | -26.0            | 0.45                 | 83.0             | 17.2                             |
| VLux_2_0.8    | -21.1            | 0.43                 | 81.9             | 15.5                             |
| VLux_2_0.9    | -17.0            | 0.51                 | 75.8             | 14.7                             |
| VLux_3_0.6    | -20.5            | 0.51                 | 89.7             | 6.1                              |
| VLux_3_0.7    | -16.5            | 0.56                 | 97.0             | 6.9                              |
| VLux_3_0.8    | -7.2             | 0.52                 | 97.2             | 6.6                              |
| VLux_3_0.9    | 1.0              | 0.48                 | 65.8             | 4.6                              |

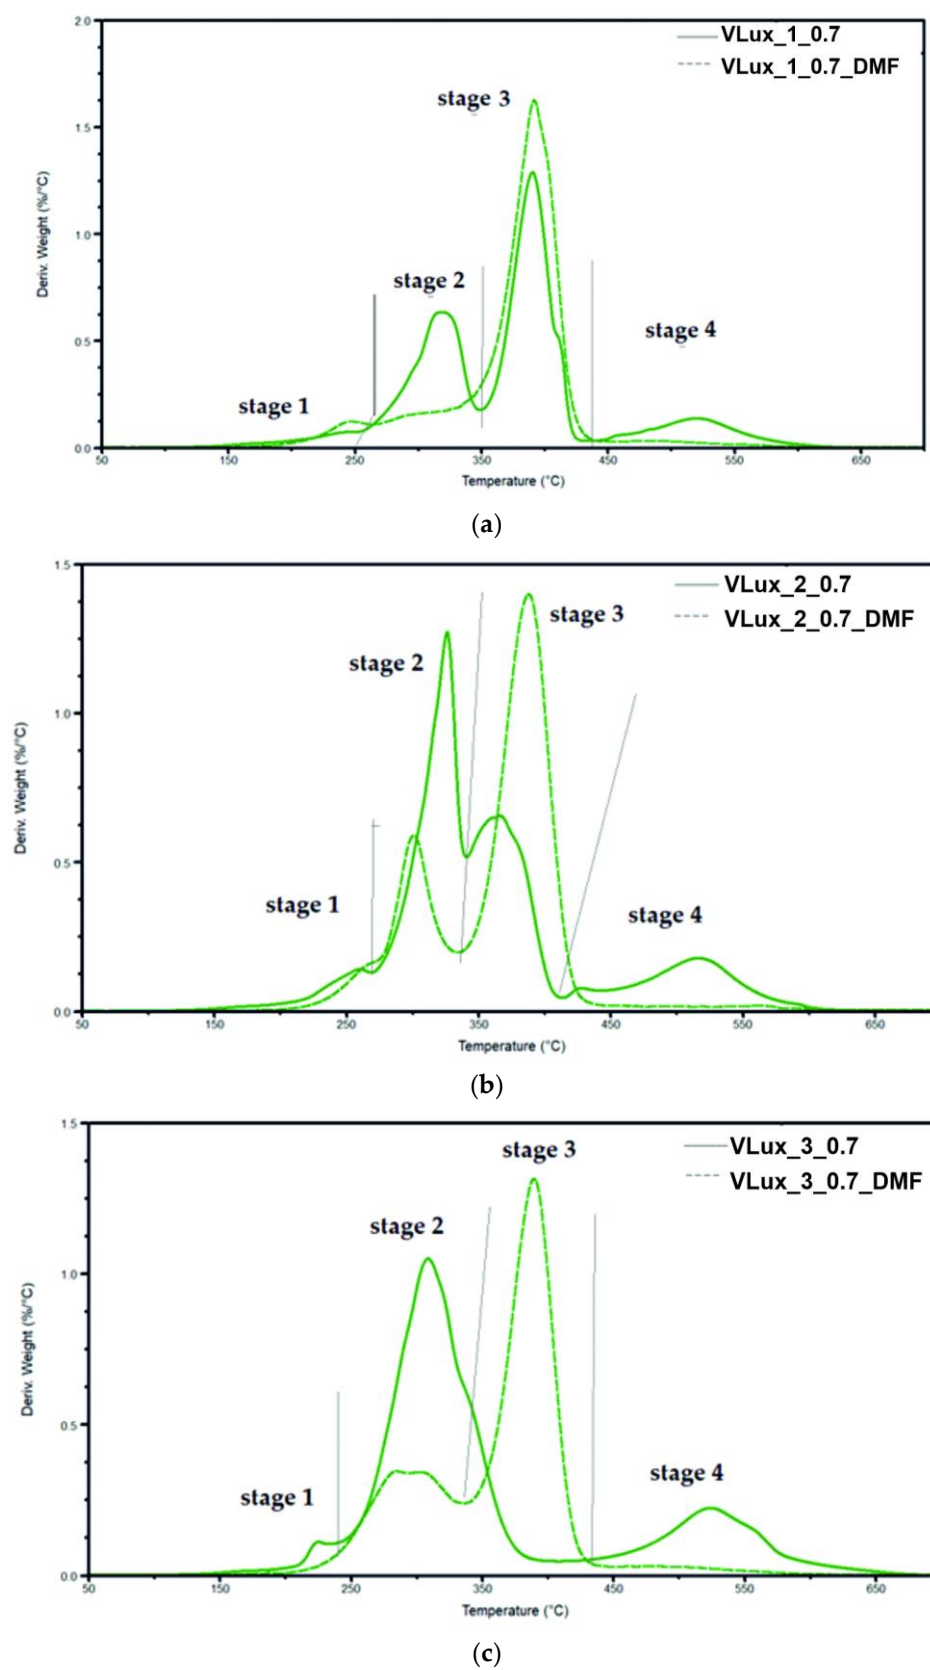

**Figure S4.** DTG curves of foams before and after exposure to DMF: (a) VLux\_1\_0.7, (b) VLux\_2\_0.7 and (c) VLux\_3\_0.7.
